# Supplementary material for: Multifunctional ammonium salts synergizing etching and passivation capability enable efficient deep-blue CsPbBr3 nanoplates
Source: Royal Society of Chemistry journal article supplement (doi:10.1039/d4tc01261e), 2024-01-01
Supplement: d4tc01261e1.pdf [file d4tc01261e1.pdf]

# Supporting Information

## Multifunctional Ammonium Salts Synergizing Etching and Passivation Capability Enable Efficient Deep-Blue CsPbBr<sub>3</sub> Nanoplates

*Yanyin Wang*<sup>a,b</sup>, *Shirong Wang*<sup>a,b</sup>, *Zhanpeng Qin*<sup>a,b</sup>, *Jing Zhou*<sup>a,b</sup>, *Sixiao Gu*<sup>a,b</sup>,  
*Xianggao Li*<sup>a,b</sup> *Hongli, Liu*<sup>a,b,\*</sup>.

a Tianjin University, School of Chemical Engineering and Technology, Tianjin  
300072, China

b Collaborative Innovation Center of Chemical Science and Engineering (Tianjin),  
Tianjin 300072, China.

### Corresponding Author

\*Email: liuhongli@tju.edu.cn (H.L.).

**Chemicals:** The following chemicals were used without purification: cesium carbonate ( $\text{Cs}_2\text{CO}_3$ , Energy Chemical, 99.9%), lead bromide ( $\text{PbBr}_2$ , Youxuan Techonology, 99.9%), oleic acid (technical grade 90%), oleyl amine (technical grade 70%), toluene (for HPLC,  $\geq 99.9\%$ ), acetone (for HPLC,  $\geq 99.9\%$ ), hexane (for HPLC,  $\geq 99.5\%$ , GC) and ethyl acetate (ACS reagent,  $\geq 99.5\%$ ) were purchased from Energy Chemical. Pyridine Hydrobromide (PyBr, Meryer, 98%), 2,6-Diaminopyridine (Aladdin, 98%), HBr (48 wt. % in  $\text{H}_2\text{O}$ ), m-Phenylenediamine (MPD, 99%) was purchased from Meryer.

**Synthesis of DaPyBr:** 0.03 mol of 2,6-diaminopyridine was dissolved in 20 ml of anhydrous ethanol at room temperature with stirring until completely dissolved. Then, a solution containing 0.09 mol of HBr was added dropwise using a dropping funnel (over 40 minutes), with simultaneous stirring. After 3-4 hours of reaction, the resulting pale-yellow solution was transferred to a rotary evaporator and evaporated. The solid obtained after rotary evaporation was dissolved in a small amount of anhydrous ethanol, followed by recrystallization with diethyl ether. This procedure was repeated two to three times, yielding a final white solid, which was vacuum dried for 24 hours.

**Synthesis of the untreated  $\text{CsPbBr}_3$  NPLs:**  $\text{CsPbBr}_3$  nanoplates (NPLs) were synthesized with the method reported by Bohn et. al. 0.1 mmol  $\text{Cs}_2\text{CO}_3$  powder was dissolved in 10 ml oleic acid at  $100^\circ\text{C}$  under continuous stirring to prepare the Cs-oleate precursor. 0.1 mmol  $\text{PbBr}_2$  powder and 100  $\mu\text{l}$  each of oleyl amine and oleic acid were

dissolved in 10 ml toluene at 100°C to form the PbBr<sub>2</sub>-precursor solution. The Cs-oleate precursor (200ul) is added under vigorous stirring into a toluene solution containing the PbBr<sub>2</sub>-oleylamine/oleic acid precursor (1ml) at room temperature. After 5 s, acetone is added to initiate the formation of NPLs. After 1 min of stirring, the solution is centrifuged at 4000 rpm for 3 min and the precipitate redispersed in 2 ml of hexane to obtain the untreated CsPbBr<sub>3</sub> NPLs.

**Synthesis of the control CsPbBr<sub>3</sub> NPLs:** The Cs-oleate precursor and PbBr<sub>2</sub>-precursor solution are the same as mentioned above. Then, the Cs-oleate precursor (150 ul) is added under vigorous stirring into a toluene solution containing the PbBr<sub>2</sub>-oleylamine/oleic acid precursor (1.5 ml) at room temperature. The remaining procedures are same as that of preparing the untreated NPLs.

**Synthesis of DaPyBr-NPLs:** First, different counts of DaPyBr (1.5 mg, 2.5mg, 3.5 mg, 4.5 mg, 5.5 mg) are dissolved in 2ml acetone to form different concentrations of DaPyBr acetone solution. The DaPyBr-CsPbBr<sub>3</sub> NPLs synthesis followed the same protocol as for CsPbBr<sub>3</sub> NPLs but including the addition of DaPyBr with the acetone step. Specifically, the Cs-oleate precursor (200 ul) is added under vigorous stirring into a toluene solution containing the PbBr<sub>2</sub>-oleylamine/oleic acid precursor (1 ml) at room temperature. After 5 s, DaPyBr acetone solution is added to initiate the formation of NPLs. After 1 min of stirring, the solution is centrifuged at 4000 rpm for 3 min and the precipitate redispersed in 2 ml of hexane to obtain the untreated CsPbBr<sub>3</sub> NPLs.

**Synthesis of PyBr-NPLs:** Different counts of PyBr (1.5 mg, 2.5mg, 3.5 mg, 4.5 mg,

5.5 mg) are dissolved in 2 ml acetone to form different concentrations of PyBr acetone solution. The remaining procedures are same as that of preparing the DaPyBr-CsPbBr<sub>3</sub> NPLs.

**Characterization:** Ultraviolet–visible (UV–vis) absorption spectra were measured by Thermo Evolution 300 UV–vis spectrometer. Steady-state photoluminescence (PL) spectra, time resolution photoluminescence (TRPL) spectra, and absolute photoluminescence quantum yield (PLQY) were carried out by a Horiba Fluorolog system with an excitation wavelength of 365 nm and a 395 nm nano-LED source. Atomic force microscopy (AFM) was performed by Bruker Dimension icon. X-ray diffraction (XRD) patterns were characterized by Rigaku Miniflex 600 with Cu K $\alpha$  radiation ( $\lambda = 1.54178 \text{ \AA}$ ). Transmission electron microscope (TEM) was performed by JEM-2100F at 200 kV accelerating voltage. X-ray photoelectron spectroscopy (XPS) spectra were recorded by a Thermo ESCALAB-250 spectrometer.

### **Calculation:**

The density functional theory (DFT) calculations were performed using a Castep module<sup>1</sup> to illustrate the phenomenon. The generalized gradient approximation (GGA) method with Perdew-Burke-Ernzerhof (PBE) function<sup>2</sup> was employed to describe the interactions between the valence electrons and the ionic core<sup>3</sup>. The energy cut-off for the plane-wave basis set was 400 eV was adopted. The threshold values of the convergence criteria were specified as follows: 0.002  $\text{\AA}$  for maximum displacement, 0.05 eV/ $\text{\AA}$  for the maximum force, 0.1 GPa for the maximum stress,  $10^{-5}$  eV/atom for

energy, and  $2.0 \times 10^{-6}$  eV/atom for self-consistent field tolerance. The surface of CsPbBr<sub>3</sub> (100) was build. 15 Å vacuum space were implemented into the model to eliminate undesirable interactions between bottom side of the slab and the molecules in the vacuum space. The (2\*2) unit cell of CsPbBr<sub>3</sub> (100) were used to prohibit lateral interactions between molecules on the surface.

The binding energy ( $\Delta E$ ) was calculated as

$$\Delta E = E_{\text{total}} - E_1 - E_2$$

where the total is the energy of the optimized system;  $E_1$  is the energy of the CsPbBr<sub>3</sub> (100);  $E_2$  is the energy of an optimized NH<sup>+</sup> and NH<sub>2</sub> molecule within a 10 Å × 10 Å × 10 Å box.

It can be concluded that the binding energy ( $\Delta E$ ) between PyBr and the NPL surface is -3.38 eV, while  $\Delta E$  between M-phenylenediamine and NPLs is -3.61 eV. The binding energy between DaPyBr and the NPL is  $\Delta E = -4.48$  eV.

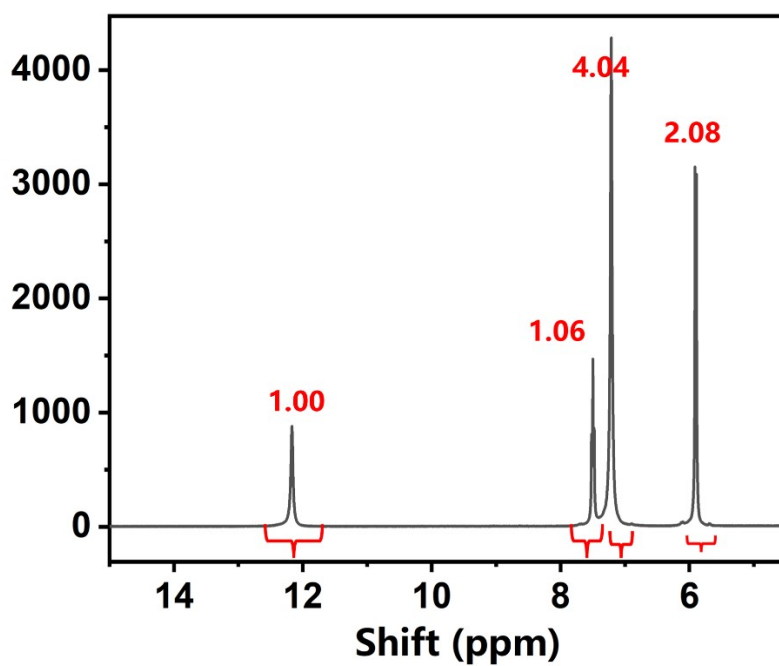

Figure S1. NMR (Nuclear Magnetic Resonance) hydrogen spectrum of DaPyBr

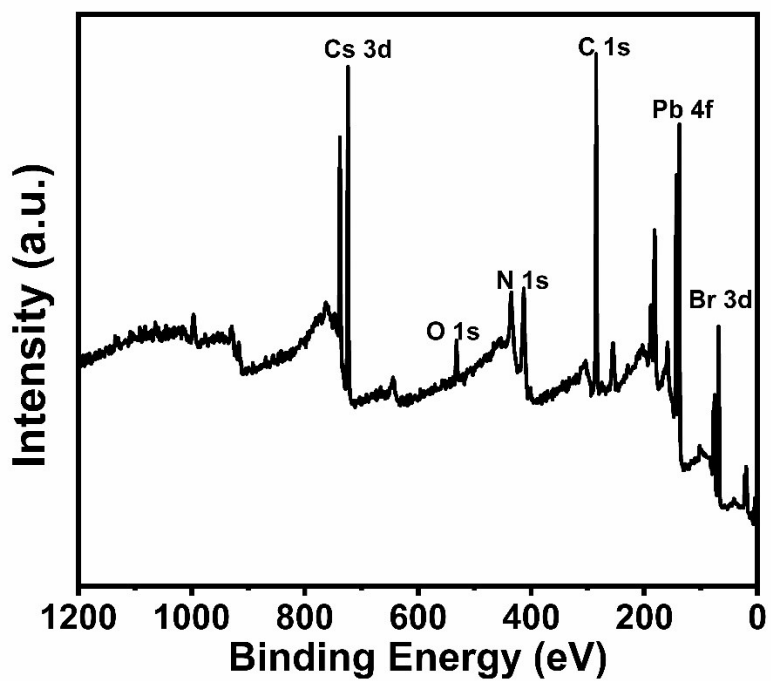

Figure S2. XPS spectrum of the untreated NPLs.

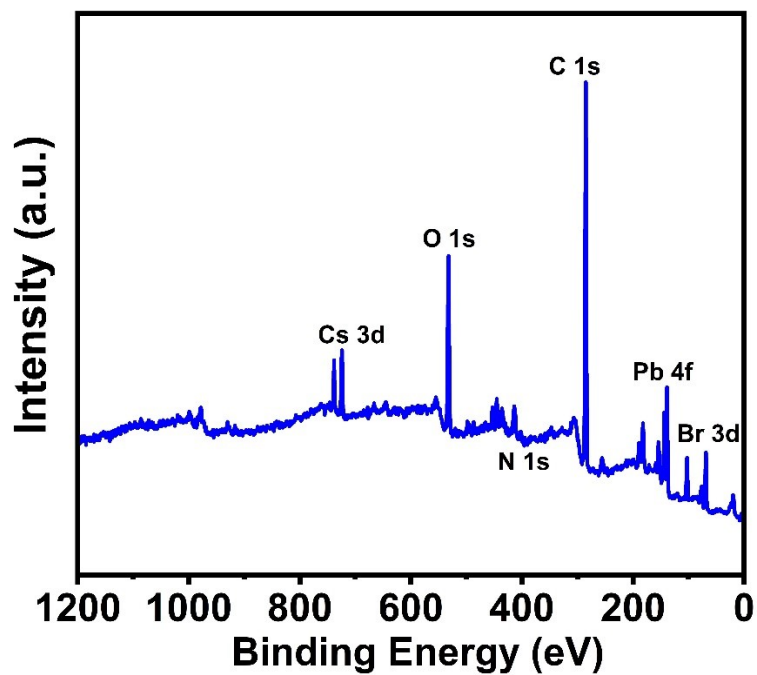

**Figure S3.** XPS spectrum of DaPyBr-NPLs

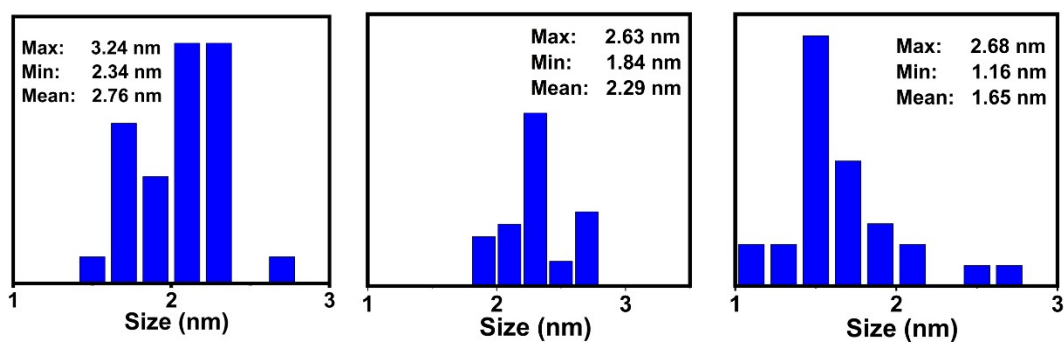

**Figure S4.** The particle size statistical analysis of the untreated NPLs and DaPyBr-NPLs with different concentrations.

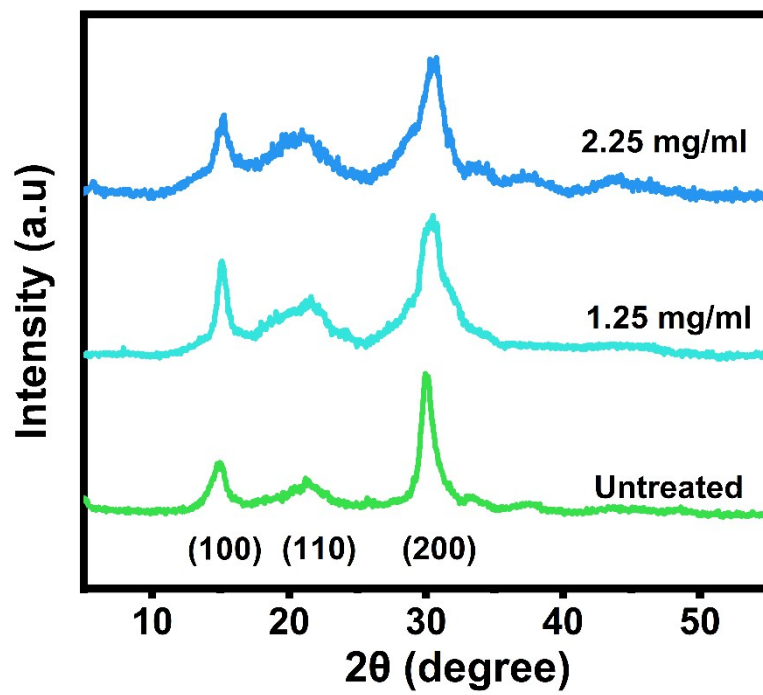

**Figure S5.** XRD patterns of the untreated CsPbBr<sub>3</sub> NPLs and different concentrations of DaPyBr.

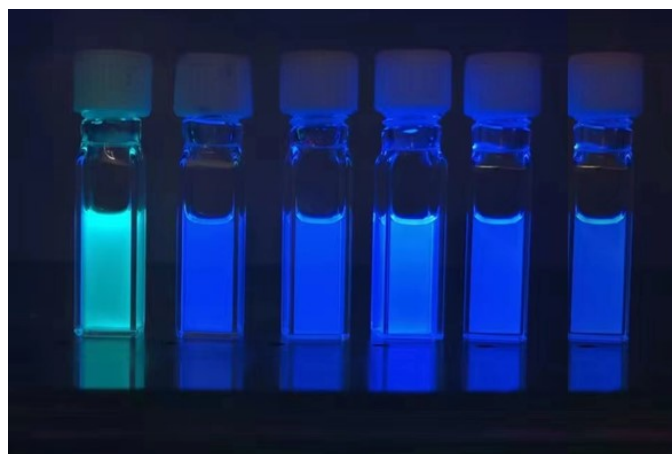

**Figure S6.** NPLs of different DaPyBr concentrations emission comparison under UV light



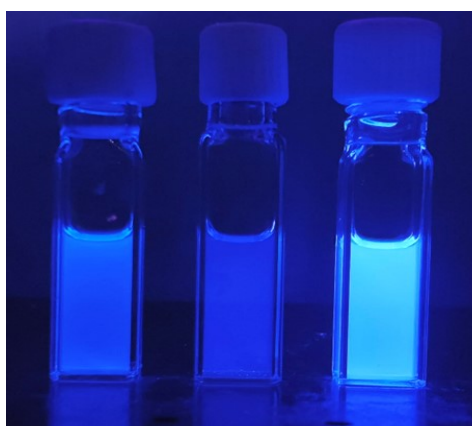

control-NPLs PyBr-NPLs DaPyBr-NPLs

**Figure S7.** The luminescence comparison after 45 days under UV light.

| Concentration (mg/ml) | Max Emission Peak (nm) | FWHM (nm) | PLQY (%) | PL lifetime (ns) |
|-----------------------|------------------------|-----------|----------|------------------|
| 0                     | 474                    | 24.97     | 15.28    | 3.68             |
| 0.75                  | 461                    | 19.79     | 17.99    | 3.62             |
| 1.25                  | 461                    | 18.86     | 30.96    | 3.70             |
| 1.75                  | 459                    | 20.35     | 79.06    | 4.70             |
| 2.25                  | 456                    | 22.17     | 99.16    | 7.62             |
| 2.75                  | 455                    | 19.70     | 62.13    | 4.90             |

**Table S1.** A summary of optical performance of DaPyBr-NPLs.

| Concentration (mg/ml) | Max Emission Peak (nm) | FWHM (nm) | PLQY (%) |
|-----------------------|------------------------|-----------|----------|
| 0                     | 474                    | 24.97     | 15.28    |
| 0.75                  | 458                    | 18.14     | 20.96    |
| 1.25                  | 456                    | 18.72     | 50.25    |
| 1.75                  | 453                    | 18.64     | 50.19    |
| 2.25                  | 452                    | 19.45     | 84.30    |
| 2.75                  | 451                    | 20.49     | 38.39    |

**Table S2.** A summary of optical performance of PyBr-NPLs

## References

1. L. Song, W. H. Liu, F. H. Xin and Y. M. Li, *Int. J. Adhes. Adhes.*, 2021, **106**.
2. Y. K. Zhang and W. T. Yang, *Phys. Rev. Lett.*, 1998, **80**, 890-890.
3. Vanderbilt, *Physical review. B, Condensed matter*, 1990, **41**, 7892-7895.
